# Supplementary material for: Enteroaggregative Escherichia coli Adherence Fimbriae Drive Inflammatory Cell Recruitment via Interactions with Epithelial MUC1
Source: PubMed Central journal article supplement (PMC5461410; doi:10.1128/mbio.00717-17), 2017-06-06

Figure S2

**A**

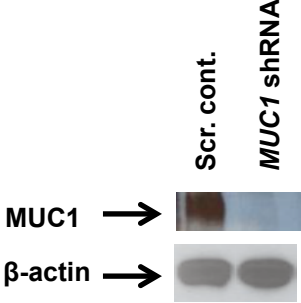

**B**

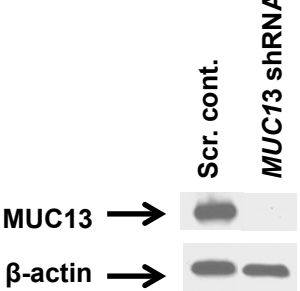

**C**

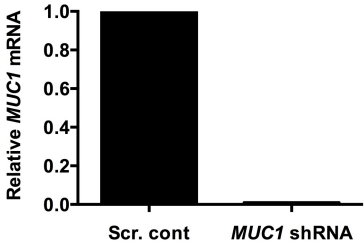

**D**

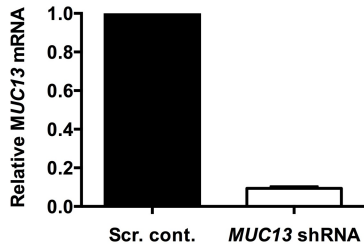

**E**

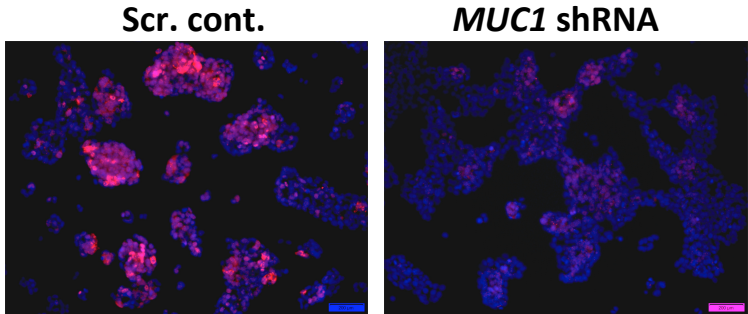

**F**

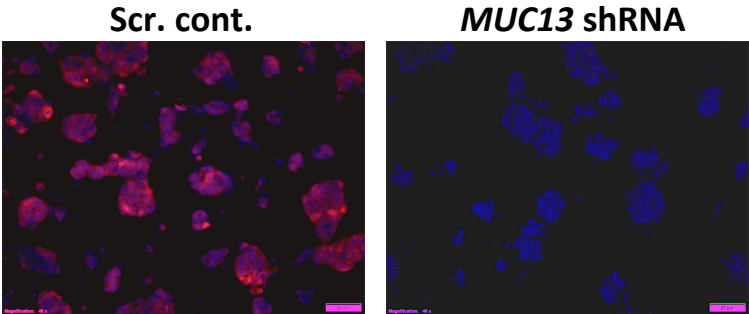

Supplement: mbo003173338sf2.pdf [file mbo003173338sf2.pdf]
