# Supplementary material for: Enteroaggregative Escherichia coli Adherence Fimbriae Drive Inflammatory Cell Recruitment via Interactions with Epithelial MUC1
Source: PubMed Central journal article supplement (PMC5461410; doi:10.1128/mbio.00717-17), 2017-06-06

**Figure S4**

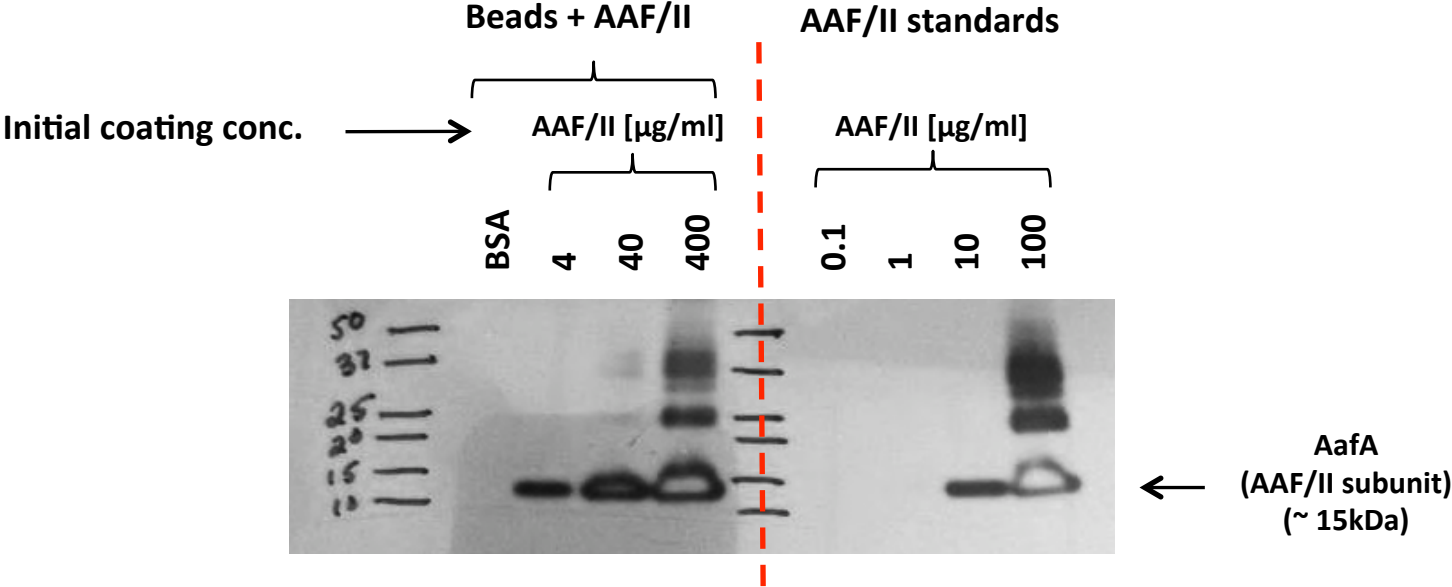

Supplement: mbo003173338sf4.pdf [file mbo003173338sf4.pdf]
